# Supplementary material for: Depletion of polyfunctional CD26highCD8+ T cells repertoire in chronic lymphocytic leukemia
Source: Springer Nature journal article supplement (doi:10.1186/s40164-023-00375-5), 2023-01-27

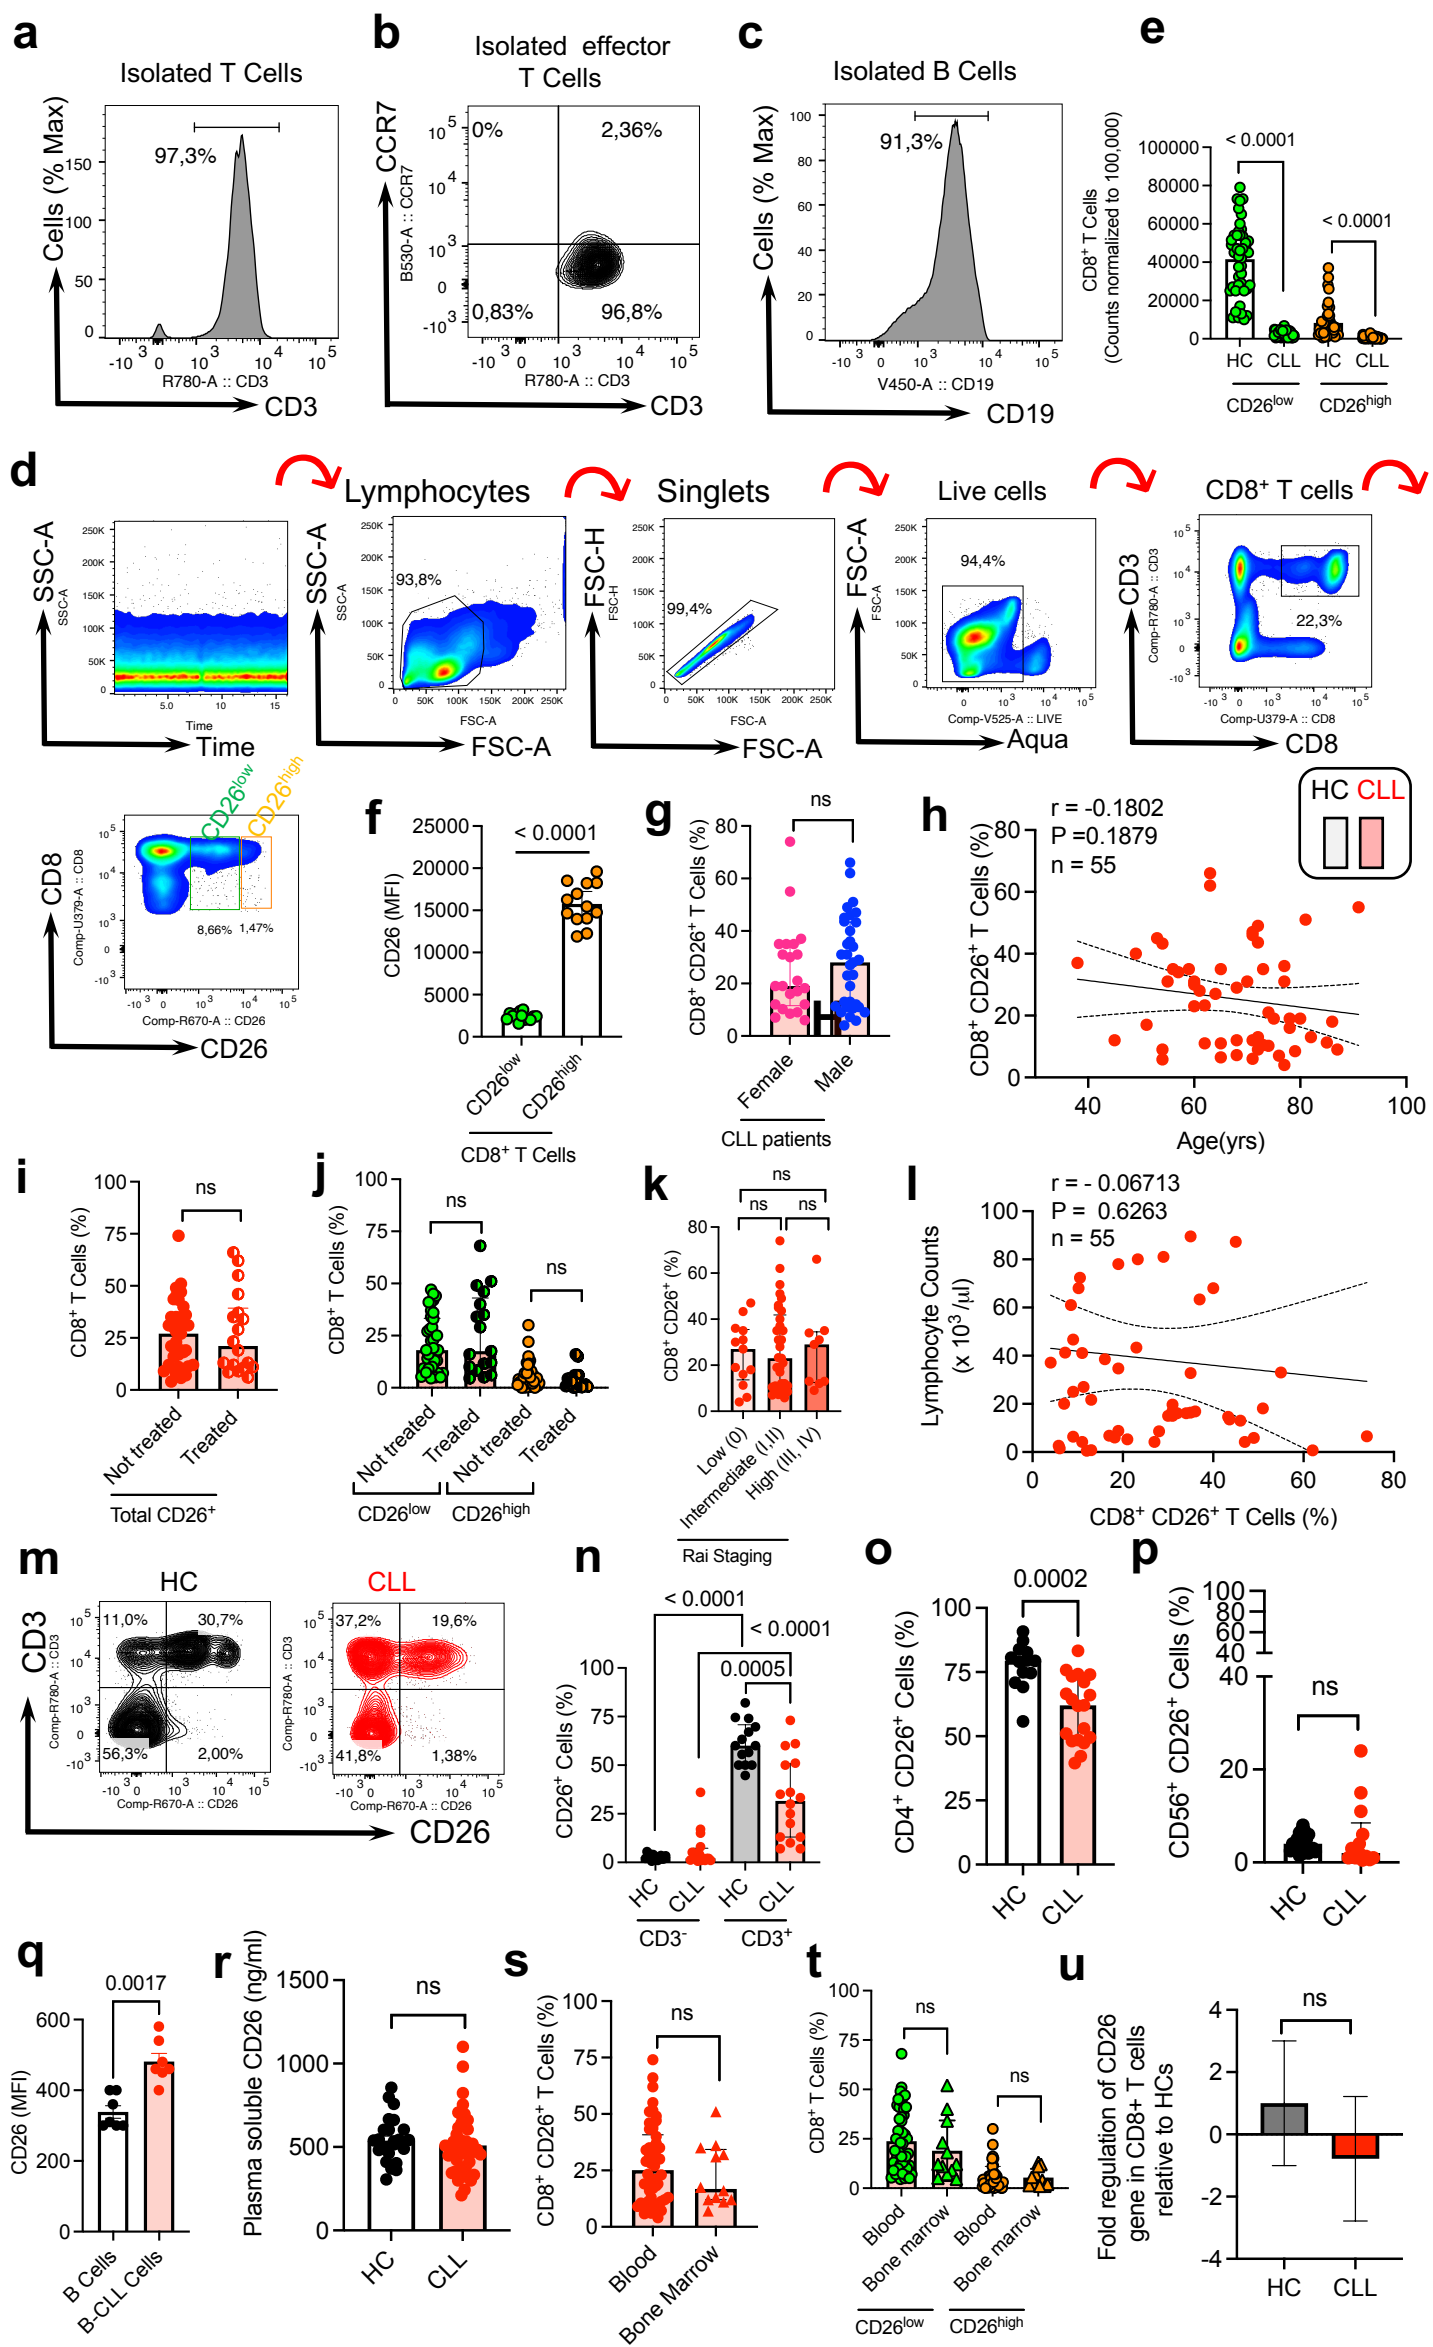

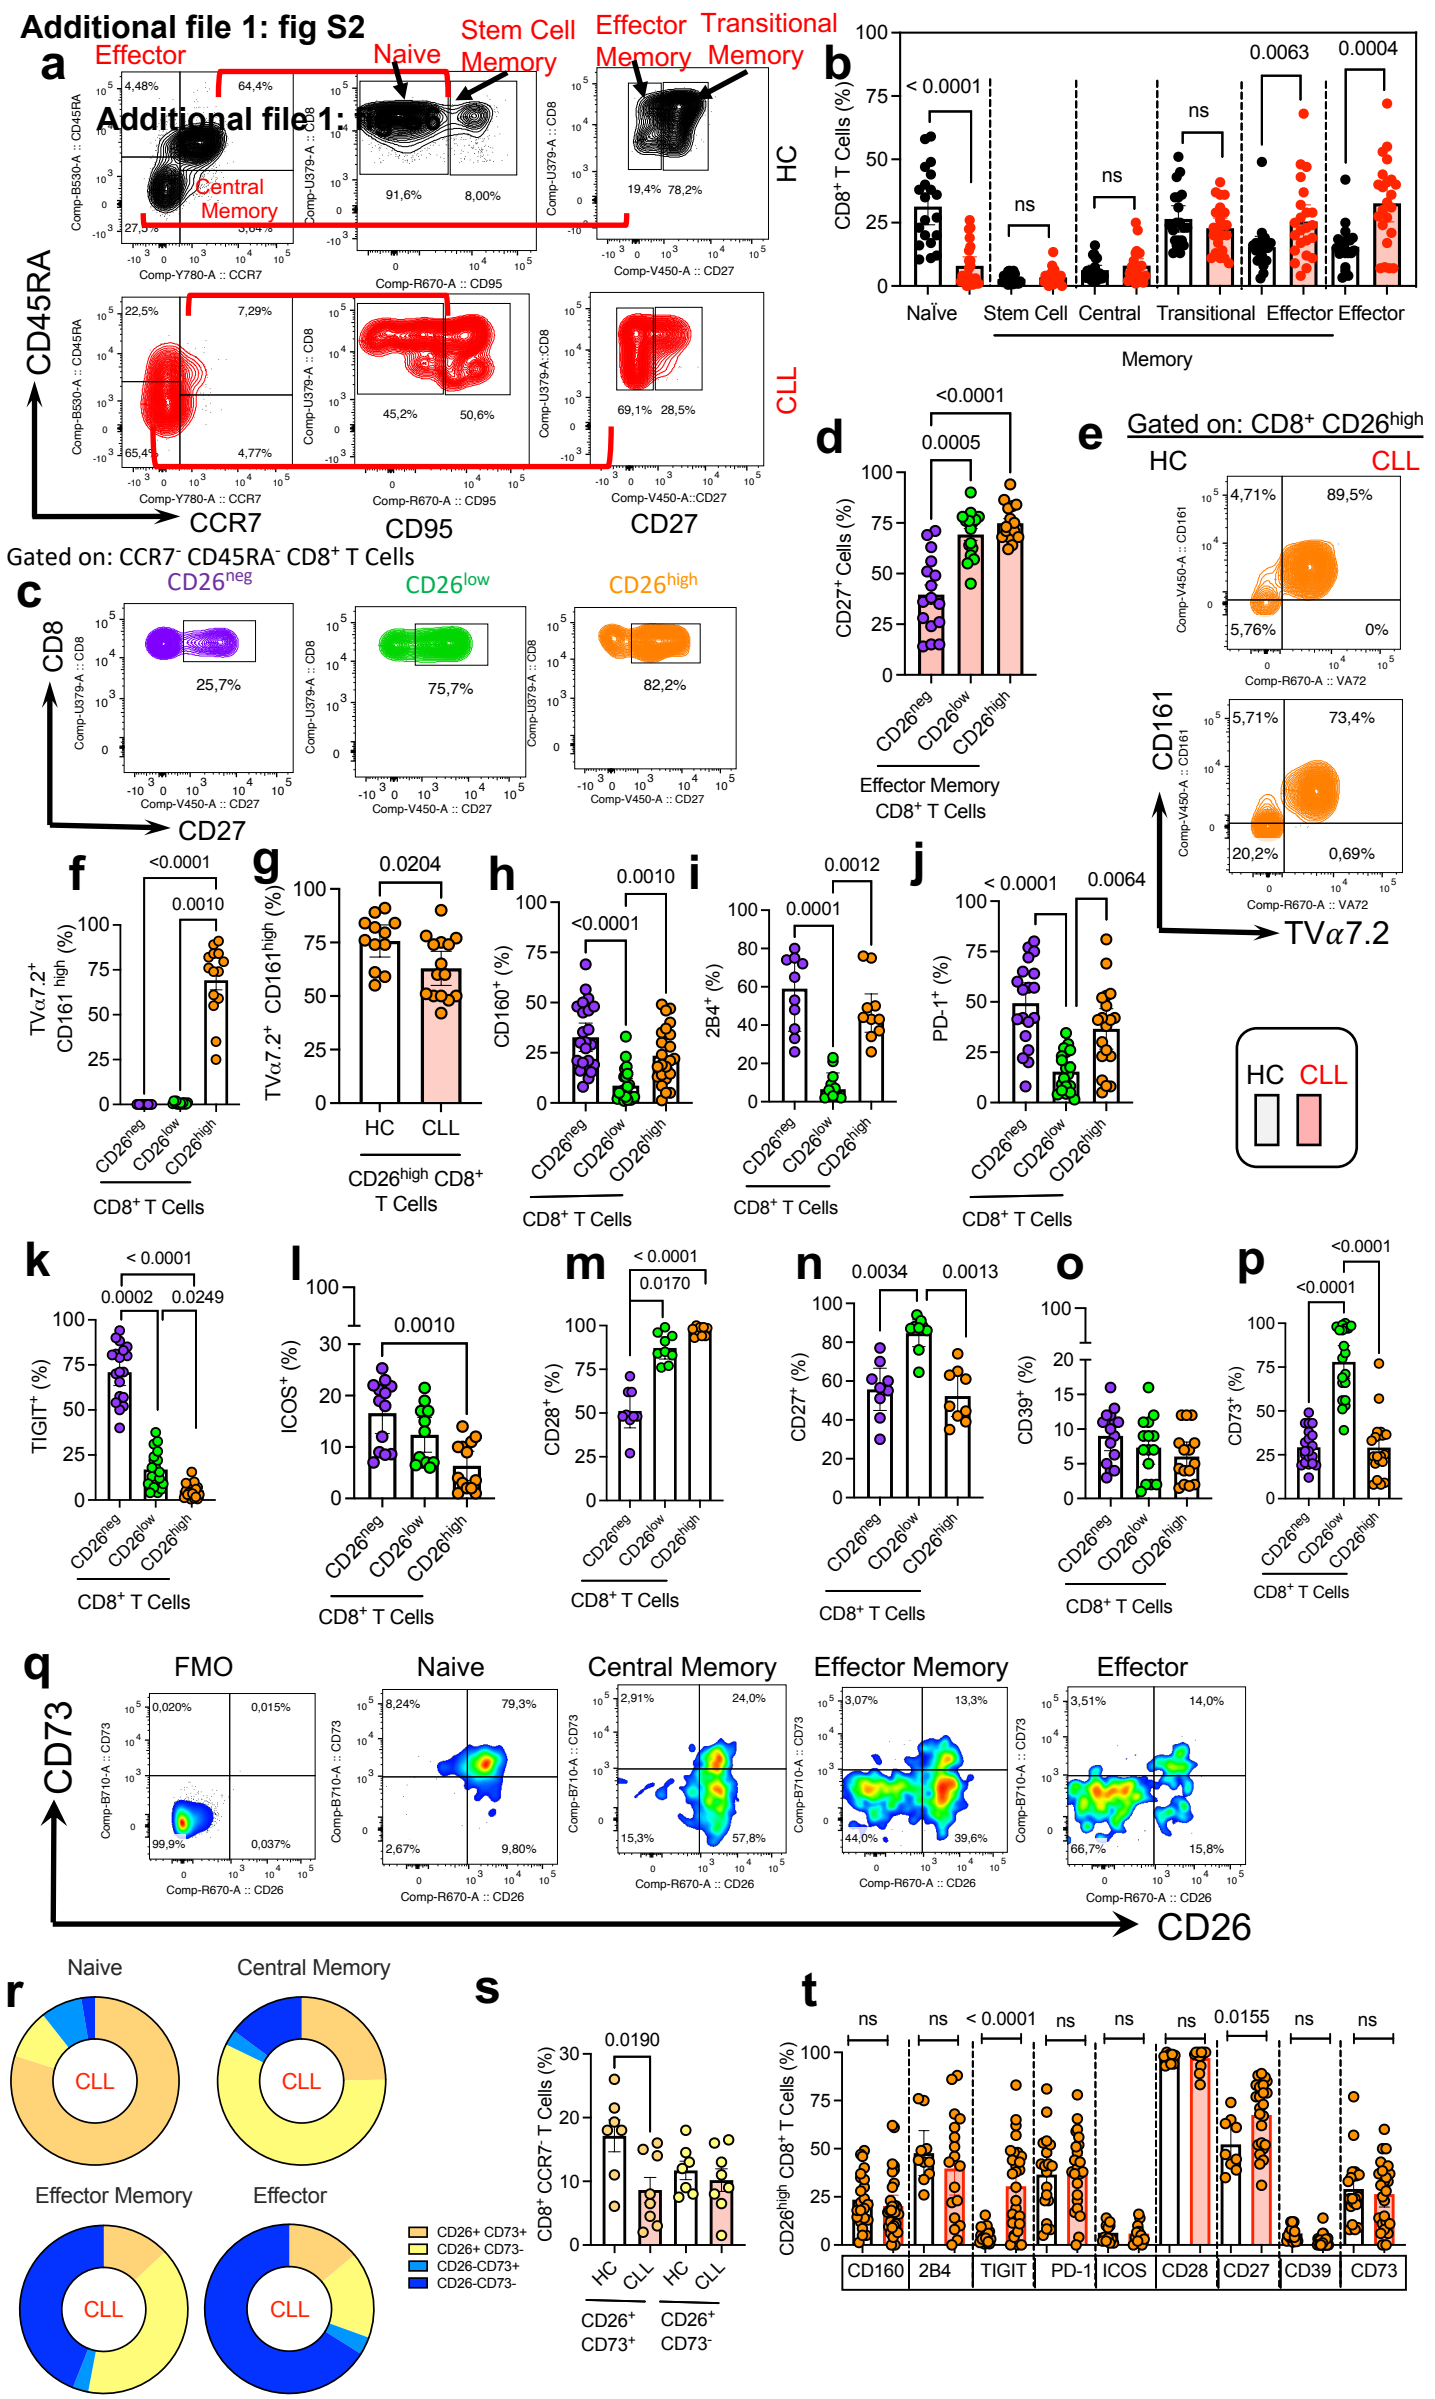

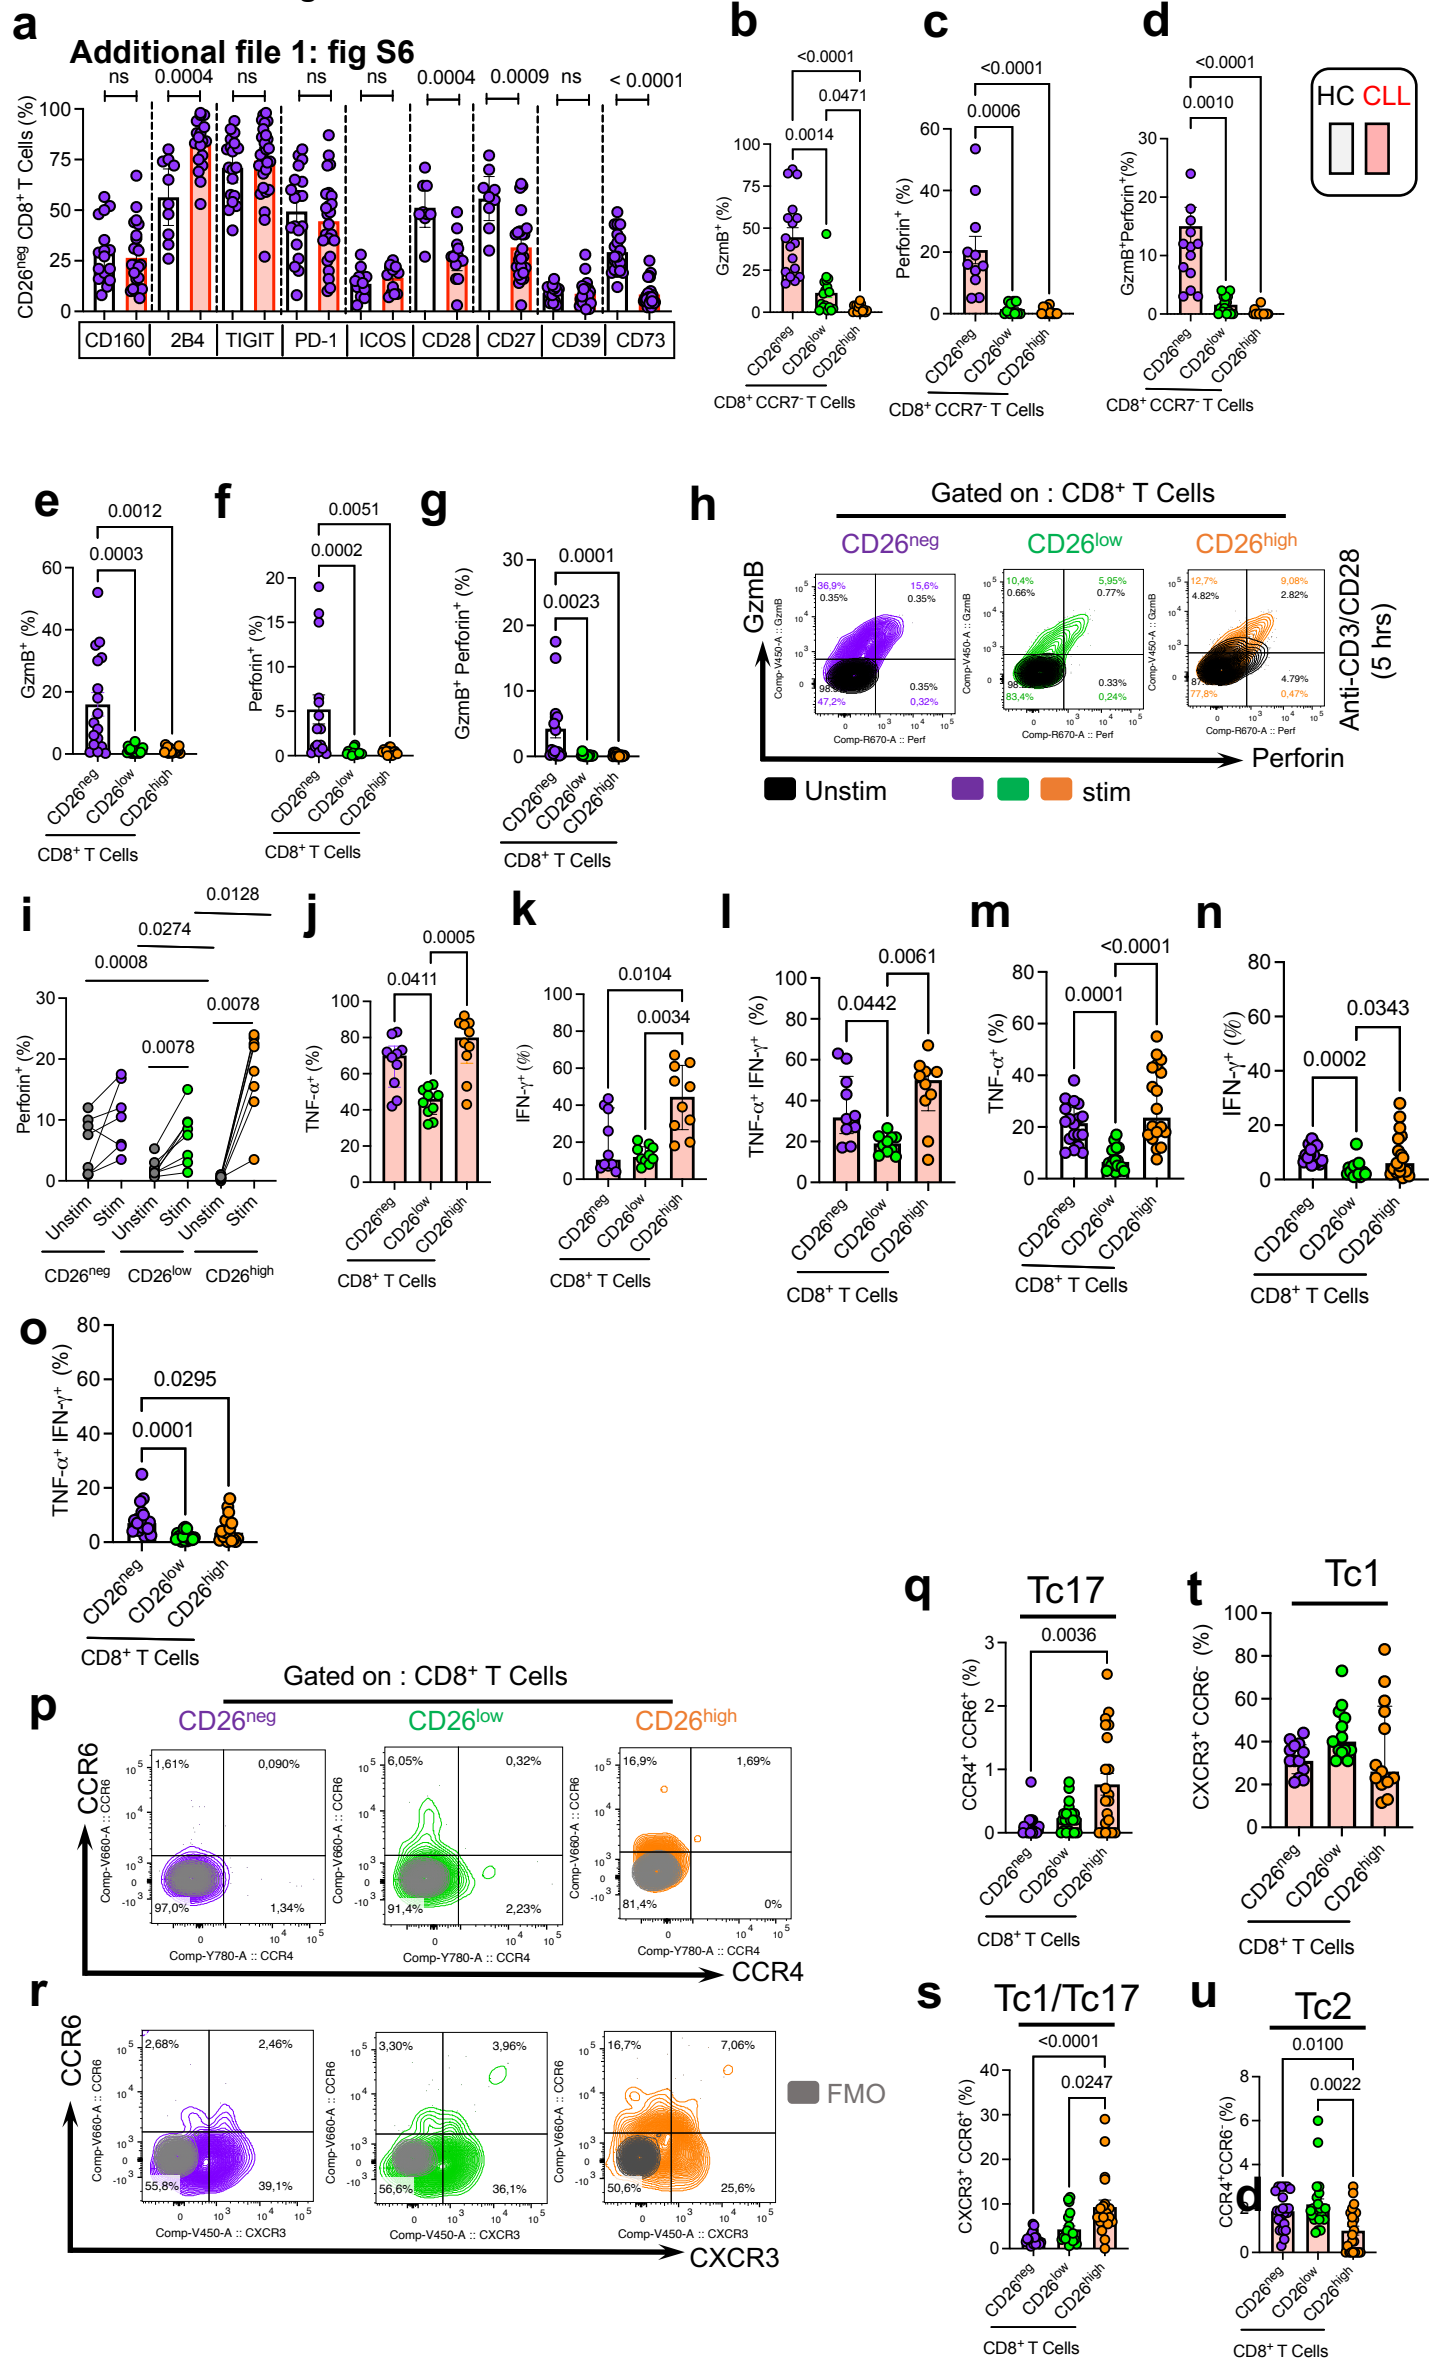

**Additional file 1: fig S4**

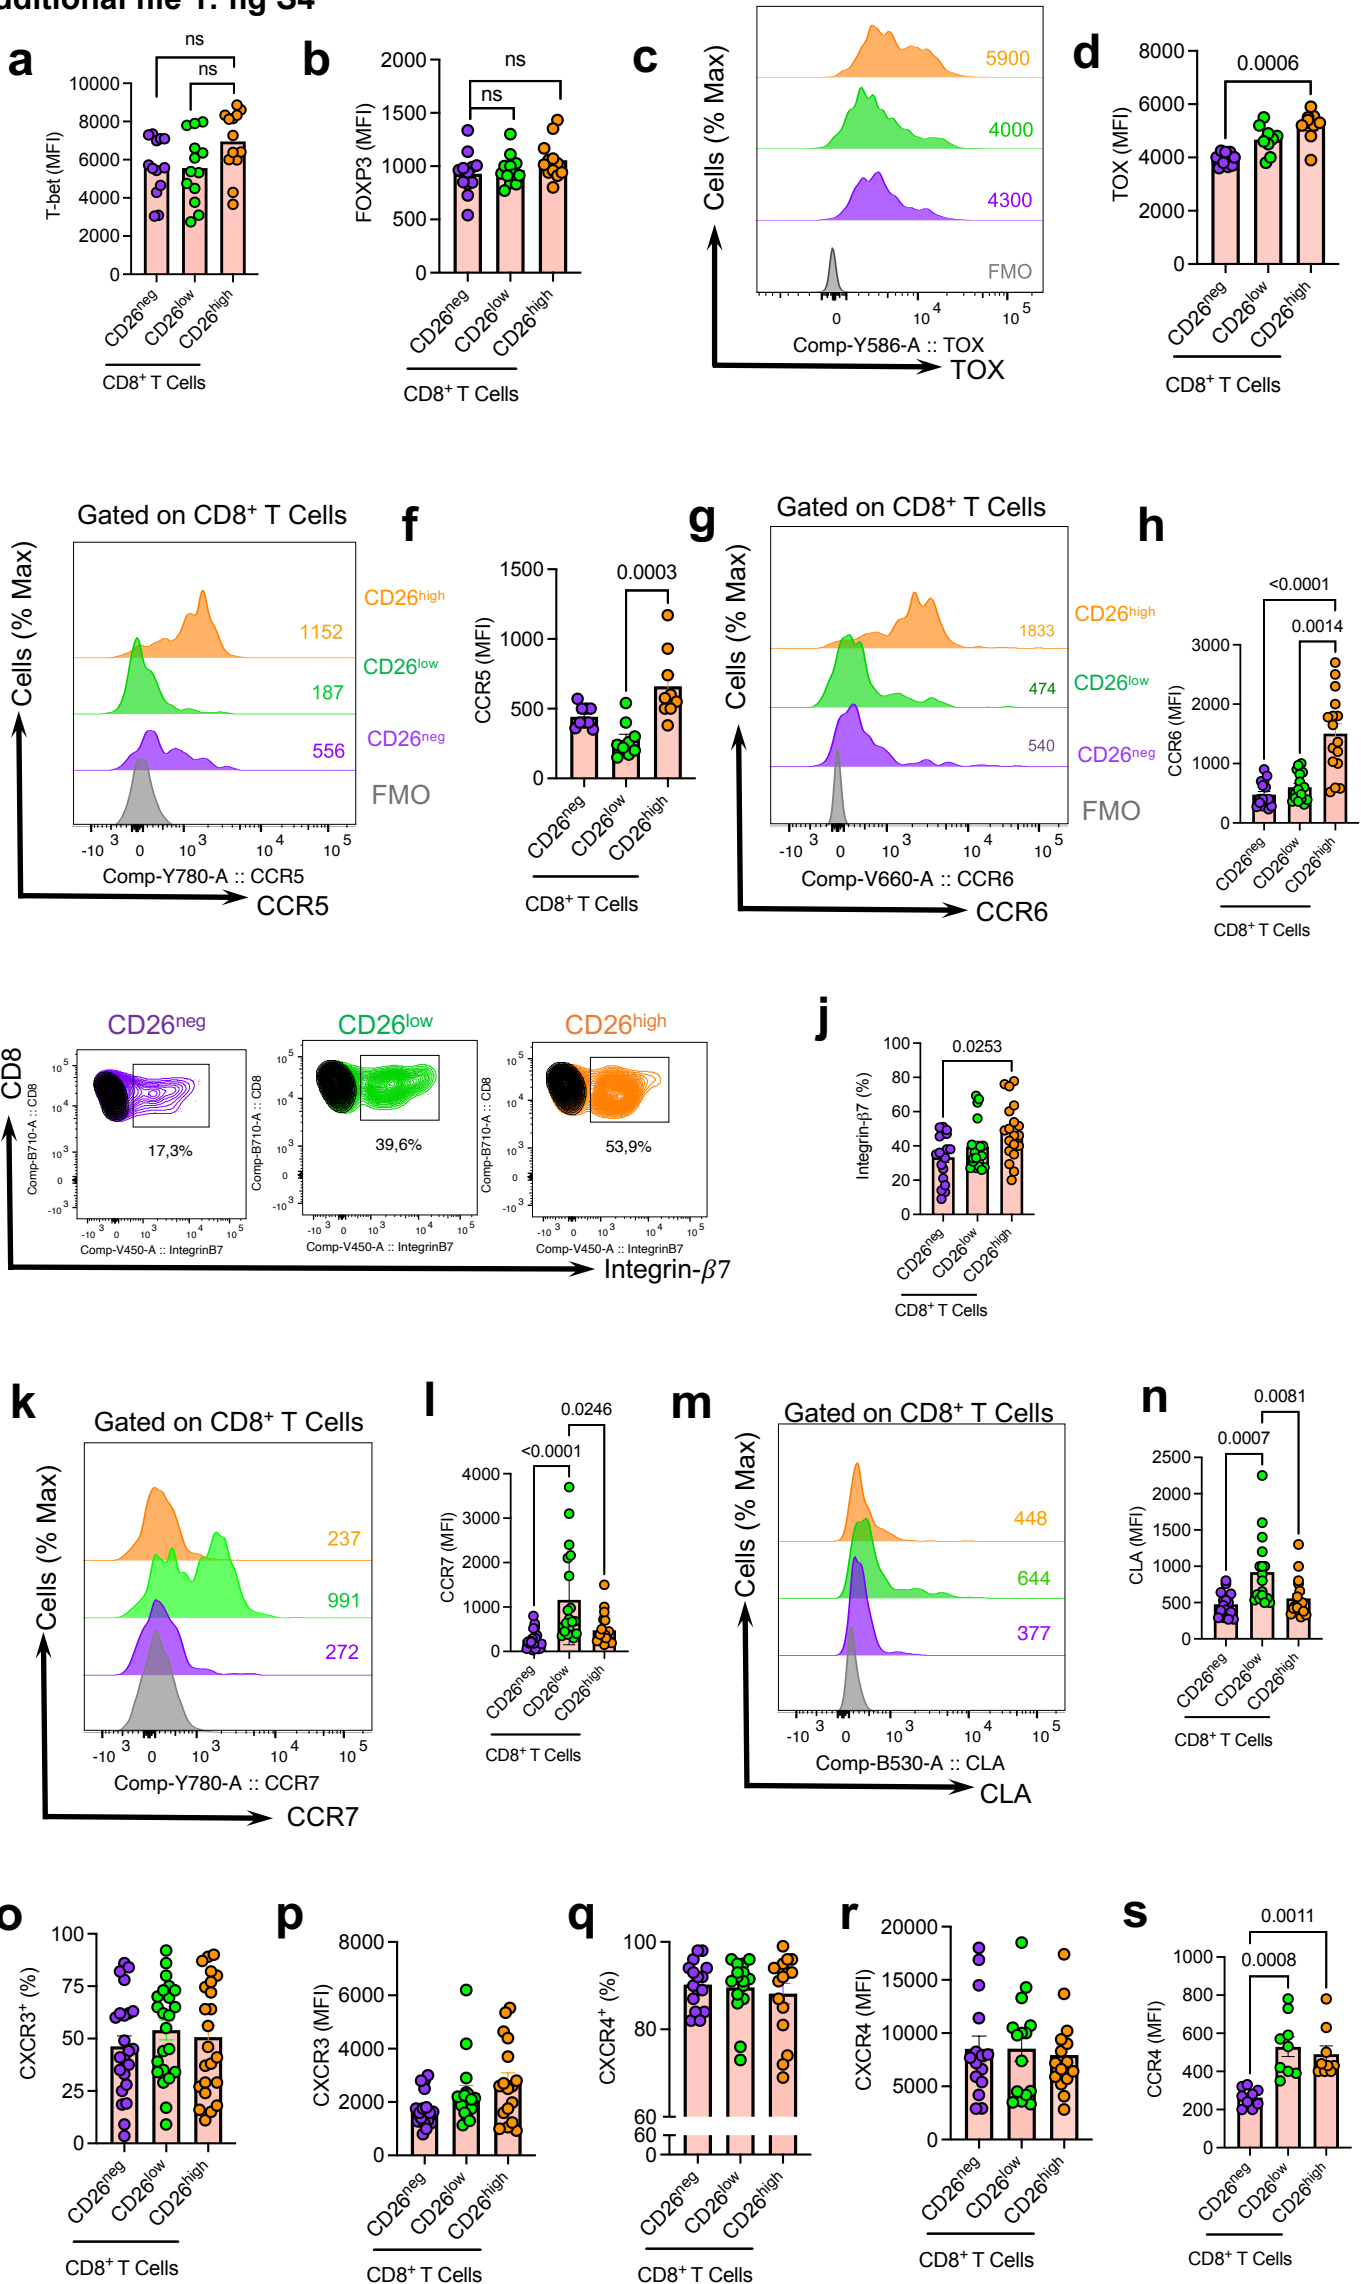

**Additional file 1: fig S5**

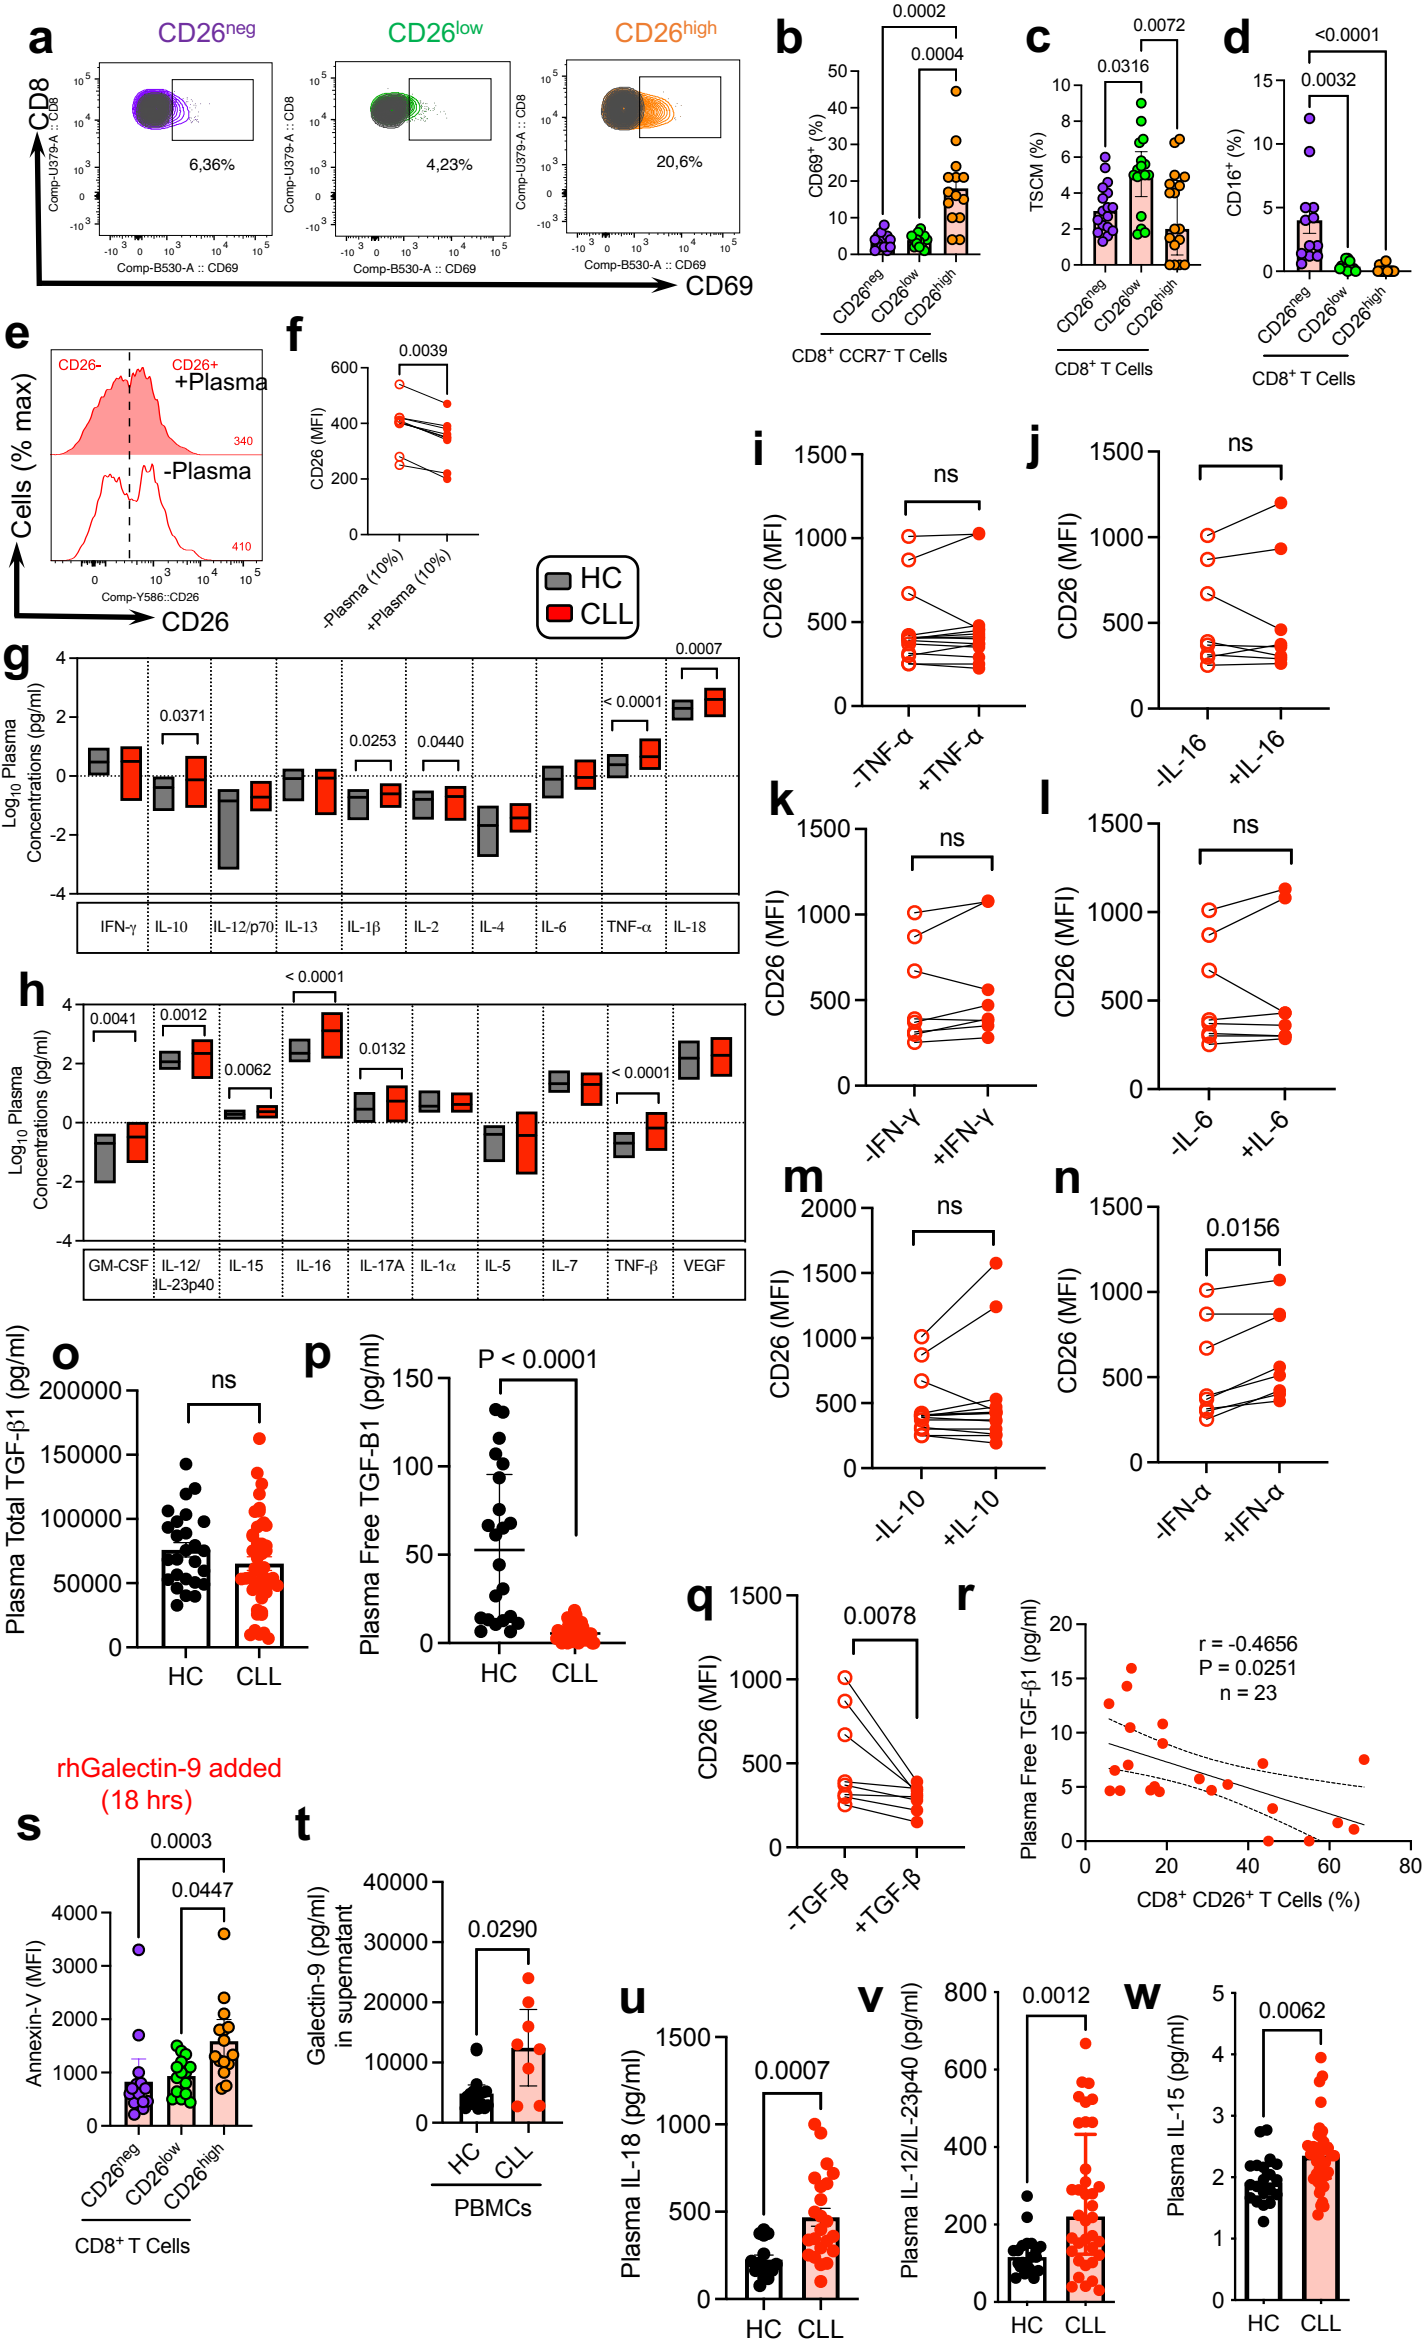

**Additional file 1: fig S6**

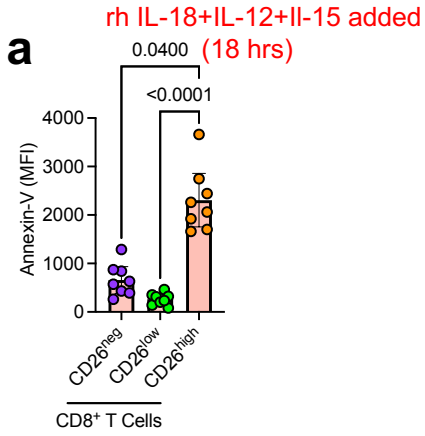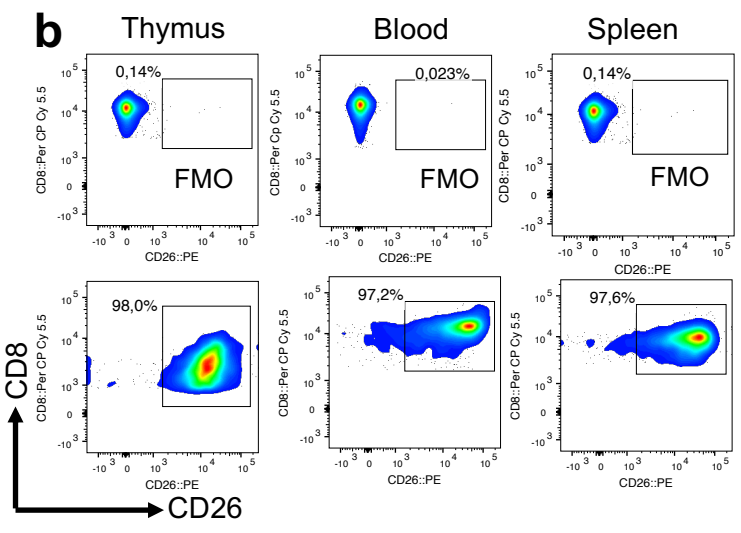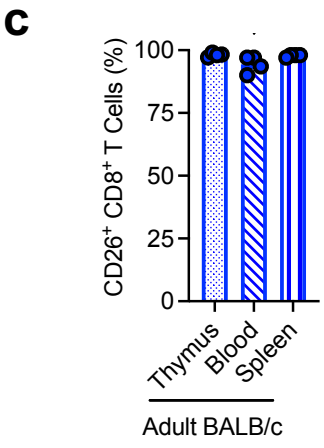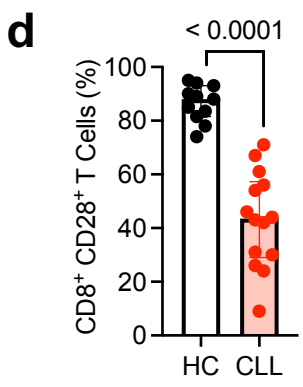

Supplement: MOESM1 [file 23961302]
