# Supplementary material for: Depletion of polyfunctional CD26highCD8+ T cells repertoire in chronic lymphocytic leukemia
Source: Springer Nature journal article supplement (doi:10.1186/s40164-023-00375-5), 2023-01-27
Supplement: MOESM2 [file 23961302]

**Additional file 2: Table S1.** Demographic and clinical information

| Patient ID | Age/year | Sex | CLL Stage | IGHV mutation | FISH analysis         | Treatment status | Treatment Course                                                            |
|------------|----------|-----|-----------|---------------|-----------------------|------------------|-----------------------------------------------------------------------------|
| 1          | 70s      | He  | II        | Unmutated     | Trisomy 12            | N                | -                                                                           |
| 2          | 50s      | She | I         | Not done      | Not done              | N                | -                                                                           |
| 3          | 50s      | He  | 0         | Unmutated     | Del 13q               | N                | -                                                                           |
| 4          | 60s      | He  | II        | Not done      | Del 13q               | T                | Chlorambucil+Obinutuzumab                                                   |
| 5          | 70s      | He  | 0         | Not done      | Del 13q               | T                | FCR 2 cycles                                                                |
| 6          | 60s      | She | 0         | Not done      | Not done              | N                | -                                                                           |
| 7          | 80s      | She | 0         | Not done      | Not done              | N                | -                                                                           |
| 8          | 80s      | He  | 0         | Not done      | Not done              | N                | -                                                                           |
| 9          | 70s      | She | 0         | Not done      | Not done              | N                | -                                                                           |
| 10         | 60s      | He  | I         | Not done      | Not done              | N                | -                                                                           |
| 11         | 80s      | He  | II        | Not done      | Not done              | N                | -                                                                           |
| 12         | 60s      | He  | I         | Not done      | Del 17p<br>Del 11q    | T                | FCR, RCVP, Allogenic stem cell transplant, Ibrutinib, Venetoclax, Rituximab |
| 13         | 70s      | He  | 0         | Not done      | Not done              | N                | -                                                                           |
| 14         | 80s      | She | I         | Not done      | Not done              | N                | -                                                                           |
| 15         | 60s      | He  | III       | Mutated       | Del 13q               | N                | -                                                                           |
| 16         | 60s      | He  | II        | Unmutated     | Del 13q               | N                | -                                                                           |
| 17         | 70s      | He  | II        | Unmutated     | Normal                | N                | -                                                                           |
| 18         | 80s      | He  | III       | Not done      | Not done              | T                | Bendamustine+ Rituximab                                                     |
| 19         | 70s      | She | IV        | Not done      | Not done              | T                | Bendamustine+ Rituximab<br>Ibrutinib                                        |
| 20         | 70s      | She | I         | Not done      | Not done              | N                | -                                                                           |
| 21         | 70s      | She | 0         | Not done      | Del 13q               | T                | Bendamustine+ Rituximab                                                     |
| 22         | 60s      | He  | I         | Not done      | Del 17p<br>Del 11q    | T                | Ibrutinib+ Rituximab                                                        |
| 23         | 60s      | He  | IV        | Unmutated     | Del 11q<br>Del 13q    | T                | FCR 2 cycles, Ibrutinib                                                     |
| 24         | 50s      | He  | II        | Not done      | Not done              | N                | -                                                                           |
| 25         | 50s      | He  | II        | Not done      | Normal                | N                | -                                                                           |
| 26         | 70s      | He  | II        | Not done      | Normal                | T                | Bendamustine+ Rituximab<br>CHOP                                             |
| 27         | 90s      | She | I         | Not done      | Not done              | T                | Chlorambucil+Obinutuzumab<br>Ibrutinib                                      |
| 28         | 60s      | He  | II        | Not done      | Not done              | N                | -                                                                           |
| 29         | 70s      | He  | IV        | Not done      | Del 13q<br>Trisomy 12 | T                | Chlorambucil+Obinutuzumab                                                   |
| 30         | 60s      | He  | II        | Not done      | Del 13q               | T                | Ibrutinib+Venetoclax                                                        |
| 31         | 60s      | She | 0         | Not done      | Not done              | N                | -                                                                           |
| 32         | 50s      | She | 0         | Not done      | Not done              | N                | -                                                                           |
| 33         | 70s      | She | I         | Not done      | Del 13q               | N                | -                                                                           |
| 34         | 70s      | She | I         | Not done      | Del 13q               | T                | Chlorambucil+Obinutuzumab                                                   |
| 35         | 70s      | He  | III       | Unmutated     | Trisomy 12            | N                | -                                                                           |
| 36         | 50s      | She | III       | Mutated       | Del 13q<br>Del 11q    | N                | -                                                                           |
| 37         | 70s      | He  | IV        | Not done      | Normal                | N                | -                                                                           |
| 38         | 40s      | She | II        | Mutated       | Del 13q               | N                | -                                                                           |
| 39         | 60s      | She | II        | Indeterminate | Trisomy 12            | N                | -                                                                           |
| 40         | 70s      | He  | II        | Unmutated     | Trisomy 12            | N                | -                                                                           |
| 41         | 70s      | He  | I         | Unmutated     | Del 13q<br>Trisomy 12 | N                | -                                                                           |

| NO# | Age | Sex | Stage | IGHV mutation | FISH analysis                 | Treatment | Treatment Course                                                              |
|-----|-----|-----|-------|---------------|-------------------------------|-----------|-------------------------------------------------------------------------------|
| 42  | 70s | He  | I     | Not done      | Del 11q                       | T         | Ibrutinib+Obinituzumab                                                        |
| 43  | 50s | He  | IV    | Not done      | Del 13q<br>Tp53 loss<br>(22%) | T         | Venetoclax+Rituximab<br>FCR+Lenalidomide<br>Ibrutinib<br>Venetoclax+Rituximab |
| 44  | 70s | He  | 0     | Not done      | Not done                      | N         | -                                                                             |
| 45  | 60s | He  | 0     | Not done      | Del 13q                       | N         | -                                                                             |
| 46  | 70s | He  | I     | Indeterminate | Trisomy 12                    | N         | -                                                                             |
| 47  | 30s | She | I     | Unmutated     | Del 17p                       | T         | Ibrutinib                                                                     |
| 48  | 70s | He  | I     | Not done      | Del 17p                       | T         | FCR                                                                           |
| 49  | 50s | He  | I     | Unmutated     | Trisomy 12                    | T         | FCR<br>Venetoclax+Rituximab                                                   |
| 50  | 50s | She | I     | Mutated       | Normal                        | N         | -                                                                             |
| 51  | 70s | He  | 0     | Mutated       | Del 13q                       | N         | -                                                                             |
| 52  | 60s | He  | II    | Mutated       | Not done                      | N         | -                                                                             |
| 53  | 60s | She | I     | Not done      | Not done                      | N         | -                                                                             |
| 54  | 40s | He  | I     | Not done      | Not done                      | N         | -                                                                             |
| 55  | 80s | She | I     | Not done      | Not done                      | N         | -                                                                             |

Treatment naïve (N), Treated (T), CLL-stage (Based on Rai staging system for CLL). The information was obtained at the time of T cell repertoire analysis.

### Summary of Supplementary Table 1.

| Characteristics             | Values (Numbers) |
|-----------------------------|------------------|
| Patients                    |                  |
| Total patients              | 55               |
| Blood samples               | 48               |
| Bone marrow samples         | 12               |
| Age (yrs)                   |                  |
| Median                      | 71               |
| Range                       | 38-91            |
| Sex                         |                  |
| Female                      | 22               |
| Male                        | 33               |
| Clinical stage (Rai)        |                  |
| Low (0)                     | 13               |
| Intermediate (I/II)         | 33               |
| High (III/IV)               | 9                |
| IGHV mutation               |                  |
| Unmutated                   | 10               |
| Mutated                     | 6                |
| Not available/Indeterminate | 37/2             |
| FISH analysis               |                  |
| Trisomy 12                  | 7                |
| Del 11q                     | 5                |
| Del 13q                     | 15               |
| Del 17p                     | 4                |
| TP53 loss+ Del 13q          | 1                |
| Trisomy12+ Del 13q          | 1                |
| Normal                      | 4                |
| Not available               | 18               |
| Treatment                   |                  |
